# Supplementary material
Source: PubMed Central journal article supplement (PMC4492302)
Supplement: NIHMS703308-supplement-Supplemental_Information.pdf [file NIHMS703308-supplement-Supplemental_Information.pdf]

# THE LANCET

## **Supplementary webappendix**

This webappendix formed part of the original submission and has been peer reviewed.  
We post it as supplied by the authors.

Supplement to: Maguire AM, High KA, Auricchio A, et al. Age-dependent effects of RPE65 gene therapy for Leber congenital amaurosis: a phase 1 dose-escalation trial. *Lancet* 2009; published online Oct 26. DOI:10.1016/S0140-6736(09)61836-5.

## **Age-dependent effects of RPE65 gene therapy for Leber congenital amaurosis: a phase 1 dose-escalation trial**

Albert M. Maguire,\* Katherine A. High,\* Alberto Auricchio, J. Fraser Wright, Eric A. Pierce, Francesco Testa, Federico Mingozzi, Jeannette L. Bennicelli, Gui-shuang Ying, Settimio Rossi, Ann Fulton, Kathleen A. Marshall, Sandro Banfi, Daniel C. Chung, Jessica I.W. Morgan, Bernd Hauck Olga Zeleniaia, Xiaosong Zhu, Leslie Raffini, Frauke Coppieters, Elfride De Baere, Kenneth S. Shindler, Nicholas J. Volpe, Enrico M. Surace, Carmela Acerra, Arkady Lyubarsky, T. Michael Redmond, Edwin Stone, Junwei Sun, Jennifer Wellman McDonnell, Bart P. Leroy, Francesca Simonelli, Jean Bennett,+

\*Co- first authors

+Corresponding author

### **Supplementary Text**

#### **METHODS**

##### **Subjects, the Study Design, the Vector and its Surgical Delivery**

Subjects underwent molecular genetic testing in CLIA laboratories prior to enrollment. Patients suffering from RPE65-related Leber congenital amaurosis (also known as *LCA2*) are generally at the better end of this genetically heterogeneous spectrum of congenital retinal dystrophies. Hence, *LCA-RPE65* is sometimes considered as early-onset retinal dystrophy rather than LCA. This ongoing semantic and nosological discussion aside, patients included in this study all suffered from congenital blindness as defined by total night blindness from birth, a best-corrected visual acuity worse than 1.0 on a LogMAR scale (Snellen visual acuity equivalent of 20/200) and/or concentric visual field constriction to a remaining central field of 5° or less in the treated eye. Nevertheless, best-corrected visual acuities were a bit better than 1.0 on a LogMAR scale in the untreated eyes of 5 subjects at presentation, but all were still severely subnormal. The pretreatment visual limitations of the treated eyes represent generally accepted preconditions for legal blindness throughout the USA and Europe. In addition all subjects had totally absent gross retinal function, both under dark- and light-adapted conditions, as evidenced by full-field electroretinography. This indicates that the remaining gross retinal function is below the threshold of what is measurable with this standard test.

The study design is a Phase 1, open-label dose escalation safety study of gene transfer in subjects with LCA-*RPE65*. The test procedures and the schedule of tests are listed in Table 1.

The original plan was to use three dose cohorts and 3 subjects in each dose cohort. After preliminary evaluations of the first six subjects injected with AAV2-hRPE65v2, (three at the low dose of  $1.5 \times 10^{10}$ vg and three at a middle dose of  $4.8 \times 10^{10}$ vg), the investigators decided to remain at the middle dose of  $4.8 \times 10^{10}$ vg for three additional subjects. By expanding the middle dose cohort to six subjects, it may have been possible to determine if there was any evidence of a dose response effect of AAV2-hRPE65v2. The primary objective of this phase 1 trial was to determine the overall safety and tolerability of subretinal administration of AAV2-hRPE65v2; however secondary clinical measures have demonstrated objective improvement in visual parameters following administration in all subjects evaluated suggesting that even the lowest dose evaluated is within the therapeutic window. Therefore, the middle dose group was expanded to include a total of 6 subjects and the entire trial included 12 subjects.

For vector production, orthogonal purification using both ion exchange chromatography and gradient ultracentrifugation yielded a product in which empty capsid constituted <2% of the final product.<sup>1</sup> Excipient was supplemented with a surfactant to prevent losses of vector to contact surfaces.<sup>2,3</sup>

#### Analysis of Effects of Test Article on Vision

For statistical analyses, the average of  $\geq 4$  pre-operative measurements were compared with the average of  $\geq 4$  measurements taken at least 1 month after injection. For NP01, NP02, and NP03, statistical analyses assigned hand motion visual acuity as LogMAR = 2.0.<sup>3</sup>

Mobility testing was carried out as described by Maguire et al.<sup>3</sup> In order to minimize a potential “learning effect, we: 1) changed the course for each eye/test; 2) keep the subject in a separate room every time a new course was set up; 3) did not provide verbal clues to the subjects and only re-directed the subjects if they walked off the course or if they were in danger of colliding with an obstacle. Subjects did not use their hands to try to feel and prevent collisions with obstacles. Subjects were told ahead of time (and shown with practice runs) not to extend their foot to feel for obstacles. If this happened, they usually bumped into an obstacle and this was counted as a collision. In addition to counting collisions, navigation through each obstacle

course was timed. Statistical analysis of mobility test results compared numbers of collisions and time to get through the course (with both eyes and/or with either eye alone) before and after injection.

### Safety and Efficacy Assessments

Subjects were evaluated prior to and at designated timepoints following surgery by complete ophthalmic examination, a general physical exam, and clinical and laboratory tests including assessment of vector biodistribution and immune response.<sup>2,3</sup>

Efficacy for each subject was monitored with objective and subjective measures of vision.

Objective measures included pupillary light reflex (PLR) responses, nystagmus testing, multi-focal ERG (mfERG).<sup>2,3</sup> Subjective measures included standard LogMAR visual acuity tests, Goldmann visual fields, full-field dark adaptometry sensitivity threshold (FST) testing, and mobility testing to assess differences in the subjects' ability to navigate a standardized obstacle course.<sup>2,3</sup>

## RESULTS

### Characteristics of the Subjects

Twelve consecutive patients with LCA-*RPE65* were enrolled and received vector between October 2007 and June 2009. Seven adults provided informed consent while parental permission was obtained from the parents of 5 children with the children providing assent, or affirmative agreement (Table 1). There were no two individuals who had the same disease-causing *RPE65* mutations except for NP01 and NP02.<sup>2,3</sup> Baseline fundus examination and OCTs documented the extent of retinal degeneration in the subjects.

### Nystagmus Testing

Nine of the twelve subjects had significant nystagmus (frequency >1 Hz) at baseline. After administration of AAV2.hRPE65v2, these nine of the 12 subjects with significant

nystagmus had a decrease in monocular and binocular amplitude and frequency of nystagmus in primary position, eccentric gaze, and with monocular cover (Table 1 and data not shown).<sup>4</sup>

#### Safety of Subretinal Injection of Vector

A macular hole was identified in NP02's injected eye at d14, as previously described.<sup>3</sup> Thereafter, procedures were instituted to minimize the chance that such a complication would occur. These included removal of epiretinal membranes, and selection of a retinotomy site a minimum of 2 disc diameters from the fovea. An epiretinal membrane noted during baseline studies in CH10's injected eye was removed prior to injection.

There were no serious adverse events in any of the subjects. Similar to results for NP01 in the low dose group,<sup>3</sup> tear samples were positive at low levels for vector DNA sequences in two of the six middle dose subjects (CH09 and CH11) on day 1 after surgery and were positive in another middle dose subject (NP04) through day 4 after surgery (Table S1). Tear samples were also low level positive in the early post-surgical period in two of the 3 high dose subjects (CH13 and NP15). All tear samples were negative thereafter. There was no evidence of systemic dissemination of vector sequences in any of the low or middle dose subjects at any time. However, peripheral blood mononuclear cells (PBMC's) were mildly positive in the immediate post-operative time period in two of the 3 high dose subjects (CH12 and CH13) and serum was also positive in this early post-operative period in CH13 (Table S1). There were minimal changes in neutralizing antibodies (NAb) directed against AAV2 after vector delivery (Table S2). An increase in neutralizing antibody (NAb) titer to AAV2 compared to baseline was observed during the first four weeks after gene transfer in the following subjects: NP-02, Day 14; CH-06, Day 14; CH-13, Day 30; NP-15, Day 14. An small increase in NAb titer was observed at Day 90 in subjects NP-01, CH-06, and CH-10 (1/2 log; Table S2). In subject CH06, the Nab titer remained at the d90 level through the d365 visit (Table S2).

There was no evidence of T cell responses to the AAV capsid as measured by IFN- $\gamma$  ELISPOT in any subject at any time (Table S2). Two of the high dose subjects had a detectable response to the RPE65 transgene product – one at baseline (NP-15) and the other at d30 (CH13; Table S2); however, there was a high level of background in these tests.

### Ambulatory Behavior

Post-injection mobility testing in NP15, the other subject under twelve years of age, is pending. The subject's parents report marked improvement in ambulation in daily and nightly activities.

### References

1. Wright JF. Manufacturing and characterizing AAV-based vectors for use in clinical studies. *Gene Ther* 2008;15(11):840-8.
2. Bennicelli J, Wright J, Komaromy A, et al. Reversal of Visual Deficits in Animal Models of Leber congenital amaurosis within Weeks after Treatment using Optimized AAV2-mediated Gene Transfer. *Mol Ther* 2008;16(3):458-65.
3. Maguire AM, Simonelli S, Pierce EA, et al. Safety and Efficacy of Gene Transfer for Leber congenital amaurosis. *New England J Medicine* 2008;358(21):2240-8.
4. Simonelli F, Maguire A, Testa F, et al. Gene therapy for Leber's congenital amaurosis is safe and effective through one year after vector administration. *Mol Ther*, in press.

**Table 1. Schedule of Subject Evaluations – Table of Clinical Assessments.**

Days are listed relative to the day of injection (day 0) through d365 (year 1). After the year 1 timepoint, follow-up is scheduled at half year and then yearly intervals. After year 5, subjects are contacted yearly through 15 years. B1, B2 = Baseline 1, Baseline 2.

|                              | B1 | B2 | -3 | 0 | 1 | 2  | 3              | 14 | 30 | 60 | 90 | 180 | 270 | 365 | 1.5 | 2-5 |
|------------------------------|----|----|----|---|---|----|----------------|----|----|----|----|-----|-----|-----|-----|-----|
| Informed consent             | X  |    |    |   |   |    |                |    |    |    |    |     |     |     |     |     |
| History/PE                   | X  |    |    |   | X |    |                |    | X  |    | X  |     |     | X   |     |     |
| Pregnancy test (blood test)  | X  |    |    | X |   |    |                |    |    |    |    |     |     |     |     |     |
| Begin prednisone             |    |    | X  |   |   |    |                |    |    |    |    |     |     |     |     |     |
| Discontinue prednisone       |    |    |    |   |   |    |                | X  |    |    |    |     |     |     |     |     |
| Vital signs                  | X  | X  |    | X | X | X  | X              | X  | X  |    |    |     |     | X   |     |     |
| Hematology                   | X  |    |    |   | X |    | X              | X  | X  |    | X  |     |     | X   |     |     |
| Chemistry                    | X  |    |    | X | X |    | X              | X  | X  |    | X  |     |     | X   |     |     |
| PBMC collection              | X  |    |    |   |   |    |                |    | X  |    |    |     |     |     |     |     |
| Urinalysis                   | X  |    |    | X | X |    | X              | X  | X  |    | X  |     |     | X   |     |     |
| AAV Ab                       | X  |    |    |   |   |    |                | X  | X  |    | X  |     |     | X   |     |     |
| RPE65 Ab                     | X  |    |    |   |   |    |                | X  | X  |    | X  |     |     | X   |     |     |
| Peripheral blood/Tear PCR    | X  |    |    | X | X | X* |                |    |    |    |    |     |     |     |     |     |
| Ophthalmic exam <sup>†</sup> | X  | X  |    |   | X | X  | X <sup>^</sup> | X  | X  | X  | X  | X   | X   | X   | X   | X   |
| OCT                          | X  |    |    |   |   |    |                |    |    | X  |    | X   |     | X   | X   | X   |
| Acuity                       | X  | X  |    |   | X | X  | X              | X  | X  | X  | X  | X   | X   | X   | X   | X   |
| Color vision                 | X  | X  |    |   |   |    |                |    | X  | X  | X  | X   | X   | X   | X   | X   |
| Contrast sensitivity         |    | X  |    |   |   |    |                |    |    |    |    | X   |     | X   | X   | X   |
| ERG                          | X  |    |    |   |   |    |                |    |    | X  |    |     |     | X   | X   | X   |

|                                  |   |   |  |   |   |   |   |   |   |   |   |   |   |   |   |   |   |
|----------------------------------|---|---|--|---|---|---|---|---|---|---|---|---|---|---|---|---|---|
| Color vision                     | X | X |  |   |   |   |   | X | X | X | X | X | X | X | X | X | X |
| Contrast sensitivity             |   | X |  |   |   |   |   |   |   |   | X |   | X | X | X | X | X |
| ERG                              | X |   |  |   |   |   |   |   |   |   | X |   |   |   | X | X | X |
| Visual field test                |   | X |  |   |   |   |   |   |   | X | X | X | X | X | X | X | X |
| Pupillometry                     |   | X |  |   |   |   |   |   |   | X | X | X | X | X | X | X | X |
| Nystagmography (ocular motility) |   | X |  |   |   |   |   |   |   |   |   | X | X | X |   | X | X |
| Fundus photography               | X |   |  | X |   |   |   |   |   | X |   |   | X |   | X | X | X |
| Quality of life                  | X |   |  |   |   |   |   |   |   |   | X |   | X |   | X | X | X |
| Mobility testing                 |   | X |  |   |   |   |   |   |   |   |   | X | X |   | X | X | X |
| Adverse event recording          | X | X |  | X | X | X | X | X | X | X | X | X | X | X | X | X | X |

Acceptable Timeframe for Subject Evaluations

| Timepoint                                                                | ± 2 days | ± 5 days | ± 30 days |
|--------------------------------------------------------------------------|----------|----------|-----------|
| Day 14                                                                   | X        |          |           |
| Days 30, 60, 90                                                          |          | X        |           |
| Days 180, 270, 365                                                       |          |          | X         |
| Years 1.5, 2-5                                                           |          |          | X         |
| Baseline tests are < 4 weeks before Day 0 (AAV2-hRPE65v2 administration) |          |          |           |

**Supplemental Table 1: Biodistribution (Vector Shedding)**

ND, not done; Pos, positive; Neg, negative; NQ, non-quantitative

*Low Dose Cohort*

|          | NP01 |       |  | NP02 |       |  | NP03 |       |
|----------|------|-------|--|------|-------|--|------|-------|
|          | Tear | Blood |  | Tear | Blood |  | Tear | Blood |
| Baseline | Neg  | Neg   |  | Neg  | Neg   |  | Neg  | Neg   |
| Day 0    | Neg  | Neg   |  | Neg  | Neg   |  | Neg  | Neg   |
| Day 1    | Pos  | Neg   |  | Neg  | Neg   |  | Neg  | Neg   |
| Day 2    | Neg  | ND    |  | Neg  | ND    |  | Neg  | ND    |
| Day 3    | Neg  | ND    |  | Neg  | Neg   |  | Neg  | Neg   |

*Middle Dose Cohort*

|          | NP04 |       |  | CH06 |       |  | CH08 |       |
|----------|------|-------|--|------|-------|--|------|-------|
|          | Tear | Blood |  | Tear | Blood |  | Tear | Blood |
| Baseline | Neg  | Neg   |  | Neg  | Neg   |  | Neg  | Neg   |
| Day 0    | Neg  | Neg   |  | Neg  | Neg   |  | Neg  | Neg   |
| Day 1    | Neg  | Neg   |  | Neg  | Neg   |  | Neg  | Neg   |
| Day 2    | Pos  | ND    |  | Neg  | ND    |  | Neg  | ND    |
| Day 3    | Pos  | Neg   |  | Neg  | Neg   |  | Neg  | Neg   |
| Day 4    | Pos  | Neg   |  |      |       |  |      |       |
| Day 6    | Neg  | Neg   |  |      |       |  |      |       |
| Day 8    | Neg  | Neg   |  |      |       |  |      |       |
| Day 9    | Neg  | Neg   |  |      |       |  |      |       |

|          | CH09 |       |  | CH10 |       |  | CH11 |       |
|----------|------|-------|--|------|-------|--|------|-------|
|          | Tear | Blood |  | Tear | Blood |  | Tear | Blood |
| Baseline | Neg  | Neg   |  | Neg  | Neg   |  | Neg  | Neg   |
| Day 0    | Neg  | Neg   |  | Neg  | Neg   |  | Neg  | Neg   |
| Day 1    | Pos  | Neg   |  | Neg  | Neg   |  | Pos  | Neg   |
| Day 2    | Neg  | ND    |  | Neg  | ND    |  | Neg  | ND    |
| Day 3    | Neg  | Neg   |  | Neg  | Neg   |  | Neg  | Neg   |

*High Dose Cohort*

|          | CH12 |       |  | CH13 |                  |  | NP15      |       |
|----------|------|-------|--|------|------------------|--|-----------|-------|
|          | Tear | Blood |  | Tear | Blood            |  | Tear      | Blood |
| Baseline | Neg  | Neg   |  | Neg  | Neg              |  | Neg       | Neg   |
| Day 0    | Neg  | Neg   |  | Neg  | Neg              |  | Neg       | Neg   |
| Day 1    | Neg  | Neg   |  | Pos  | Pos<br>PBMC<br>& |  | Pos<br>NQ | Neg   |

|        |     |                   |  |                                      |                    |  |           |     |
|--------|-----|-------------------|--|--------------------------------------|--------------------|--|-----------|-----|
|        |     |                   |  |                                      | Serum<br>NQ        |  |           |     |
| Day 2  | Pos | ND                |  | Pos<br>Both eyes<br>Uninjected<br>NQ | ND                 |  | Pos<br>NQ | ND  |
| Day 3  | Pos | Pos<br>PBMC<br>NQ |  | Neg                                  | Pos<br>Serum<br>NQ |  | Neg       | Neg |
| Day 8  | ND  | Neg               |  | ND                                   | ND                 |  | Neg       | ND  |
| Day 14 | ND  | Neg               |  | Neg                                  | Neg                |  |           |     |
| Day 30 | ND  | Neg               |  | Neg                                  | Neg                |  |           |     |

**Supplementary Table 2. T Cell Response analysis IFN- $\gamma$  ELISPOT**

- Poor cell viability; \*\* high background; BV: baseline visit

**Low Dose Cohort**

| <b>Subject ID</b> | <b>Visit Name</b> | <b>Capsid IFN-<math>\gamma</math><br/>ELISPOT</b> | <b>RPE65 IFN-<math>\gamma</math><br/>ELISPOT</b> |
|-------------------|-------------------|---------------------------------------------------|--------------------------------------------------|
| <b>NP01</b>       | <b>BV 1</b>       | <b>Negative</b>                                   | <b>Negative</b>                                  |
|                   | <b>Day 14</b>     | <b>Negative</b>                                   | <b>Negative</b>                                  |
|                   | <b>Day 30</b>     | <b>Negative</b>                                   | <b>Negative</b>                                  |
|                   | <b>Day 90</b>     | <b>Negative</b>                                   | <b>Negative</b>                                  |
|                   |                   |                                                   |                                                  |
| <b>NP02</b>       | <b>BV 1</b>       | <b>Negative</b>                                   | <b>Negative</b>                                  |
|                   | <b>Day 14</b>     | <b>Negative**</b>                                 | <b>Negative**</b>                                |
|                   | <b>Day 30</b>     | <b>Negative</b>                                   | <b>Negative</b>                                  |
|                   | <b>Day 90</b>     | <b>Negative</b>                                   | <b>Negative</b>                                  |
|                   |                   |                                                   |                                                  |
| <b>NP03</b>       | <b>BV 1</b>       | <b>Negative</b>                                   | <b>Negative</b>                                  |
|                   | <b>Day 14</b>     | <b>Negative</b>                                   | <b>Negative</b>                                  |
|                   | <b>Day 30</b>     | <b>Negative</b>                                   | <b>Negative</b>                                  |
|                   | <b>Day 90</b>     | <b>N/A</b>                                        | <b>N/A</b>                                       |

**Middle Dose Cohort**

| <b>Subject ID</b> | <b>Visit Name</b> | <b>Capsid IFN-<math>\gamma</math><br/>ELISPOT</b> | <b>RPE65 IFN-<math>\gamma</math><br/>ELISPOT</b> |
|-------------------|-------------------|---------------------------------------------------|--------------------------------------------------|
| <b>NP04</b>       | <b>BV 1</b>       | <b>Negative</b>                                   | <b>Negative</b>                                  |
|                   | <b>Day 14</b>     | <b>Negative</b>                                   | <b>Negative</b>                                  |
|                   | <b>Day 30</b>     | <b>N/A*</b>                                       | <b>N/A*</b>                                      |
|                   | <b>Day 90</b>     | <b>Negative</b>                                   | <b>Negative</b>                                  |
|                   |                   |                                                   |                                                  |
| <b>CH06</b>       | <b>BV 1</b>       | <b>Negative</b>                                   | <b>Negative</b>                                  |
|                   | <b>Day 14</b>     | <b>Negative</b>                                   | <b>Negative</b>                                  |
|                   | <b>Day 30</b>     | <b>Negative**</b>                                 | <b>Negative**</b>                                |
|                   | <b>Day 90</b>     | <b>Negative</b>                                   | <b>Negative</b>                                  |
|                   |                   |                                                   |                                                  |
| <b>CH08</b>       | <b>BV 1</b>       | <b>Negative</b>                                   | <b>Negative</b>                                  |
|                   | <b>Day 14</b>     | <b>Negative</b>                                   | <b>Negative</b>                                  |
|                   | <b>Day 30</b>     | <b>Negative**</b>                                 | <b>Negative**</b>                                |
|                   | <b>Day 90</b>     | <b>Negative</b>                                   | <b>Negative</b>                                  |

|             |               |                   |                   |
|-------------|---------------|-------------------|-------------------|
|             |               |                   |                   |
| <b>CH09</b> | <b>BV 1</b>   | <b>Negative</b>   | <b>Negative</b>   |
|             | <b>Day 14</b> | <b>Negative</b>   | <b>Negative</b>   |
|             | <b>Day 30</b> | <b>Negative</b>   | <b>Negative</b>   |
|             | <b>Day 90</b> | <b>Negative</b>   | <b>Negative</b>   |
|             |               |                   |                   |
| <b>CH10</b> | <b>BV 1</b>   | <b>Negative</b>   | <b>Negative</b>   |
|             | <b>Day 14</b> | <b>Negative</b>   | <b>Negative</b>   |
|             | <b>Day 30</b> | <b>Negative</b>   | <b>Negative</b>   |
|             | <b>Day 90</b> | <b>Negative**</b> | <b>Negative**</b> |
|             |               |                   |                   |
| <b>CH11</b> | <b>BV 1</b>   | <b>Negative</b>   | <b>Negative</b>   |
|             | <b>Day 14</b> | <b>Negative</b>   | <b>Negative</b>   |
|             | <b>Day 30</b> | <b>Negative**</b> | <b>Negative**</b> |
|             | <b>Day 90</b> | <b>Negative</b>   | <b>Negative</b>   |

### High Dose Cohort

| <b>Subject ID</b> | <b>Visit Name</b> | <b>Capsid IFN-<math>\gamma</math><br/>ELISPOT</b> | <b>RPE65 IFN-<math>\gamma</math><br/>ELISPOT</b> |
|-------------------|-------------------|---------------------------------------------------|--------------------------------------------------|
| <b>CH12</b>       | <b>BV 1</b>       | <b>Negative</b>                                   | <b>Negative</b>                                  |
|                   | <b>Day 14</b>     | <b>Negative</b>                                   | <b>Negative</b>                                  |
|                   | <b>Day 30</b>     | <b>Negative</b>                                   | <b>Negative</b>                                  |
|                   | <b>Day 90</b>     | <b>Negative*</b>                                  | <b>Negative*</b>                                 |
|                   |                   |                                                   |                                                  |
| <b>CH13</b>       | <b>BV 1</b>       | <b>Negative</b>                                   | <b>Negative</b>                                  |
|                   | <b>Day 14</b>     | <b>Negative</b>                                   | <b>Negative</b>                                  |
|                   | <b>Day 30</b>     | <b>Negative</b>                                   | <b>Positive</b>                                  |
|                   | <b>Day 90</b>     | <b>Pending</b>                                    | <b>Pending</b>                                   |
|                   |                   |                                                   |                                                  |
| <b>NP15</b>       | <b>BV 1</b>       | <b>Negative**</b>                                 | <b>Positive**</b>                                |
|                   | <b>Day 14</b>     | <b>Negative*</b>                                  | <b>Negative*</b>                                 |
|                   | <b>Day 30</b>     | <b>Negative</b>                                   | <b>Negative</b>                                  |
|                   | <b>Day 90</b>     | <b>Pending</b>                                    | <b>Pending</b>                                   |

**Anti-AAV2 Neutralizing Antibody****Low Dose Cohort**

| <b>Subject ID</b> | <b>Visit Name</b> | <b>Neutralizing Antibody</b> |
|-------------------|-------------------|------------------------------|
| <b>NP01</b>       | <b>BV 1</b>       | <b>&lt;1:3.16</b>            |
|                   | <b>Day 14</b>     | <b>&lt;1:3.16</b>            |
|                   | <b>Day 30</b>     | <b>&lt;1:3.16</b>            |
|                   | <b>Day 90</b>     | <b>1:10 – 1:31.6</b>         |
|                   | <b>Day 365</b>    | <b>1:3.16 – 1:10</b>         |
|                   |                   |                              |
| <b>NP02</b>       | <b>BV 1</b>       | <b>&lt;1:3.16</b>            |
|                   | <b>Day 14</b>     | <b>1:31.6 – 1:100</b>        |
|                   | <b>Day 30</b>     | <b>1:10 – 1:31.6</b>         |
|                   | <b>Day 90</b>     | <b>1:10 – 1:31.6</b>         |
|                   | <b>Day 365</b>    | <b>Neat – 1:3.1*</b>         |
|                   |                   |                              |
| <b>NP03</b>       | <b>BV 1</b>       | <b>1:3.16 – 1:10</b>         |
|                   | <b>Day 14</b>     | <b>1:3.16 – 1:10</b>         |
|                   | <b>Day 30</b>     | <b>1:3.16 – 1:10</b>         |
|                   | <b>Day 90</b>     | <b>1:3.16 – 1:10</b>         |
|                   | <b>Day 365</b>    | <b>1:3.16 – 1:10</b>         |

**Middle Dose Cohort**

| <b>Subject ID</b> | <b>Visit Name</b> | <b>Neutralizing Antibody</b> |
|-------------------|-------------------|------------------------------|
| <b>NP04</b>       | <b>BV 1</b>       | <b>1:3.16 – 1:10</b>         |
|                   | <b>Day 14</b>     | <b>1:3.16 – 1:10</b>         |
|                   | <b>Day 30</b>     | <b>1:3.16 – 1:10</b>         |
|                   | <b>Day 90</b>     | <b>1:3.16 – 1:10</b>         |
|                   | <b>Day 365</b>    | <b>1:3.16 – 1:10</b>         |
|                   |                   |                              |
| <b>CH06</b>       | <b>BV 1</b>       | <b>1:31.6 – 1:100</b>        |
|                   | <b>Day 14</b>     | <b>1:316 – 1:1000</b>        |
|                   | <b>Day 30</b>     | <b>1:31.6 – 1:100</b>        |
|                   | <b>Day 90</b>     | <b>1:100 – 1:316</b>         |
|                   | <b>Day 365</b>    | <b>1:100 – 1:316</b>         |
|                   |                   |                              |

|             |                |                        |
|-------------|----------------|------------------------|
| <b>CH08</b> | <b>BV 1</b>    | <b>1:10 – 1:31.6</b>   |
|             | <b>Day 14</b>  | <b>1:10 – 1:31.6</b>   |
|             | <b>Day 30</b>  | <b>1:3.16 – 1:10</b>   |
|             | <b>Day 90</b>  | <b>1:3.16 – 1:10</b>   |
|             | <b>Day 365</b> | <b>Pending</b>         |
|             |                |                        |
| <b>CH09</b> | <b>BV 1</b>    | <b>1:3.16 – 1:10</b>   |
|             | <b>Day 14</b>  | <b>1:3.16 – 1:10</b>   |
|             | <b>Day 30</b>  | <b>1:3.16 – 1:10</b>   |
|             | <b>Day 90</b>  | <b>1:3.16 – 1:10</b>   |
|             | <b>Day 365</b> | <b>Pending</b>         |
|             |                |                        |
| <b>CH10</b> | <b>BV 1</b>    | <b>1:300 – 1:350</b>   |
|             | <b>Day 14</b>  | <b>1:300 – 1:350</b>   |
|             | <b>Day 30</b>  | <b>1:300 – 1:350</b>   |
|             | <b>Day 90</b>  | <b>1:1000 – 1:3160</b> |
|             | <b>Day 365</b> | <b>pending</b>         |
|             |                |                        |
| <b>CH11</b> | <b>BV 1</b>    | <b>1:3.16 – 1:10</b>   |
|             | <b>Day 14</b>  | <b>1:3.16 – 1:10</b>   |
|             | <b>Day 30</b>  | <b>1:3.16 – 1:10</b>   |
|             | <b>Day 90</b>  | <b>1:3.16 – 1:10</b>   |
|             | <b>Day 365</b> | <b>Pending</b>         |

**High Dose Cohort**

| <b>Subject ID</b> | <b>Visit Name</b> | <b>Neutralizing Antibody</b> |
|-------------------|-------------------|------------------------------|
| <b>CH12</b>       | <b>BV 1</b>       | <b>Neat – 1:3.1</b>          |
|                   | <b>Day 14</b>     | <b>Neat – 1:3.1</b>          |
|                   | <b>Day 30</b>     | <b>Neat – 1:3.1</b>          |
|                   | <b>Day 90</b>     | <b>Neat – 1:3.1</b>          |
|                   | <b>Day 365</b>    | <b>Pending</b>               |
|                   |                   |                              |
| <b>CH13</b>       | <b>BV 1</b>       | <b>Neat – 1:3.1</b>          |
|                   | <b>Day 14</b>     | <b>Neat – 1:3.1</b>          |
|                   | <b>Day 30</b>     | <b>1:10 – 1:31.6</b>         |
|                   | <b>Day 90</b>     | <b>Pending</b>               |
|                   | <b>Day 365</b>    | <b>Pending</b>               |

|             |                |                     |
|-------------|----------------|---------------------|
|             |                |                     |
| <b>NP15</b> | <b>BV 1</b>    | <b>Neat – 1:3.1</b> |
|             | <b>Day 14</b>  | <b>1:3.1 – 1:10</b> |
|             | <b>Day 30</b>  | <b>1:3.1 – 1:10</b> |
|             | <b>Day 90</b>  | <b>Pending</b>      |
|             | <b>Day 365</b> | <b>Pending</b>      |

**Anti-RPE65 Antibody ELISA (Humoral Response**

#, Minimally positive with one test (shown); negative on repeat test

| <b>Subject</b>     | <b>Baseline</b> | <b>Day 14</b> | <b>Day 30</b> | <b>Day 90</b>  | <b>Day 365</b> |
|--------------------|-----------------|---------------|---------------|----------------|----------------|
| <b>Low dose</b>    |                 |               |               |                |                |
| <b>NP01</b>        | <b>ND</b>       | <b>ND</b>     | <b>ND</b>     | <b>ND</b>      | <b>ND</b>      |
| <b>NP02</b>        | <b>ND</b>       | <b>ND</b>     | <b>ND</b>     | <b>ND</b>      | <b>ND</b>      |
| <b>NP03</b>        | <b>ND</b>       | <b>ND</b>     | <b>ND</b>     | <b>100#/ND</b> | <b>ND</b>      |
| <b>Middle dose</b> |                 |               |               |                |                |
| <b>NP04</b>        | <b>ND</b>       | <b>ND</b>     | <b>ND</b>     | <b>ND</b>      | <b>ND</b>      |
| <b>CH06</b>        | <b>ND</b>       | <b>ND</b>     | <b>ND</b>     | <b>ND</b>      | <b>ND</b>      |
| <b>CH08</b>        | <b>ND</b>       | <b>ND</b>     | <b>ND</b>     | <b>ND</b>      | <b>ND</b>      |
| <b>CH09</b>        | <b>ND</b>       | <b>ND</b>     | <b>ND</b>     | <b>ND</b>      | <b>Pending</b> |
| <b>CH10</b>        | <b>ND</b>       | <b>ND</b>     | <b>ND</b>     | <b>ND</b>      | <b>Pending</b> |
| <b>CH11</b>        | <b>ND</b>       | <b>ND</b>     | <b>ND</b>     | <b>ND</b>      | <b>Pending</b> |
| <b>High dose</b>   |                 |               |               |                |                |
| <b>CH12</b>        | <b>ND</b>       | <b>ND</b>     | <b>ND</b>     | <b>ND</b>      | <b>Pending</b> |
| <b>CH13</b>        | <b>ND</b>       | <b>ND</b>     | <b>ND</b>     | <b>ND</b>      | <b>Pending</b> |
| <b>NP15</b>        | <b>ND</b>       | <b>ND</b>     | <b>ND</b>     | <b>Pending</b> | <b>Pending</b> |

Supplementary Table 3 The association of age with VA outcome (in logMar) in the injected eye

|                                                    | Correlation with age                  |             | age 8-11 yrs<br>group (n=4) | age 19-44<br>yrs group<br>(n=8) |  |              |
|----------------------------------------------------|---------------------------------------|-------------|-----------------------------|---------------------------------|--|--------------|
| VA Outcome                                         | Pearson<br>Correlation<br>Coefficient | P-<br>value | Mean (SE)                   | Mean (SE)                       |  | P-<br>value* |
| Baseline VA of injected<br>eye                     | 0.72                                  | 0.009       | 1.12 (0.11)                 | 1.81 (0.39)                     |  | 0.04         |
|                                                    |                                       |             |                             |                                 |  |              |
| Final VA                                           | 0.65                                  | 0.02        | 1.09 (0.25)                 | 1.45 (0.30)                     |  | 0.46         |
| Change of final VA from<br>baseline                | -0.24                                 | 0.45        | -0.03 (0.24)                | -0.35 (0.13)                    |  | 0.22         |
| Mean Post-injection VA                             | 0.73                                  | 0.007       | 1.00 (0.18)                 | 1.50 (0.29)                     |  | 0.28         |
| Mean change of post-<br>injection VA from baseline | -0.20                                 | 0.53        | -0.12 (0.14)                | -0.30 (0.19)                    |  | 0.34         |

\* From the comparison of means using two group t-test.

Supplementary Table 4 VA at baseline and at post-injection for each of 12 patients

| ID                    | Age (yrs) | Days of last visit | Baseline VA | Final visit VA | Mean of Post-injection VA | Mean Change of post-injection VA from baseline | P-value for test the significant change in post-injection VA |
|-----------------------|-----------|--------------------|-------------|----------------|---------------------------|------------------------------------------------|--------------------------------------------------------------|
| CH06                  | 20        | 365                | 1.35        | 1.83           | 1.78                      | 0.43                                           | 0.04                                                         |
| CH08                  | 9         | 365                | 1.03        | 1.62           | 1.20                      | 0.17                                           | 0.60                                                         |
| CH09                  | 8         | 365                | 1.03        | 1.04           | 1.03                      | -0.003                                         | 0.91                                                         |
| CH10                  | 10        | 270                | 1.45        | 1.29           | 1.29                      | -0.16                                          | 0.002                                                        |
| CH11                  | 24        | 270                | 1.02        | 0.60           | 0.60                      | -0.42                                          | 0.0004                                                       |
| CH12                  | 44        | 180                | 3.42        | 3.25           | 3.25                      | -0.17                                          | NA*                                                          |
| CH13                  | 35        | 90                 | 1.91        | 1.60           | 1.63                      | -0.28                                          | 0.19                                                         |
| NP01                  | 26        | 577                | 2.00        | 1.47           | 1.56                      | -0.44                                          | 0.02                                                         |
| NP02                  | 26        | 577                | 2.00        | 1.41           | 1.44                      | -0.56                                          | <0.0001                                                      |
| NP03                  | 19        | 545                | 1.50        | 0.96           | 1.06                      | -0.45                                          | 0.004                                                        |
| NP04                  | 17        | 365                | 1.27        | 0.54           | 0.71                      | -0.56                                          | 0.006                                                        |
| NP15                  | 11        | 90                 | 0.96        | 0.42           | 0.49                      | -0.47                                          | 0.03                                                         |
|                       |           |                    |             |                |                           |                                                |                                                              |
| All patients combined |           |                    | 1.58        | 1.34           | 1.35                      | -0.24                                          | 0.02                                                         |

P-value could not be calculated as there is no variation in the post-injection VA (ie, all post-injection VA are the same).

**Supplementary Table 5.** Representative Pupillary Light Reflex.Result Summary.

Table 5. Analyses compare baseline values with post-injection values in the treated eye using Test 1 (alternating brief (0.2 sec) flashes of light). Post-injection values, Mean(SD), were measured at 2-3 months after injection except for NP01, NP03, and NP04, where measurements were made at 5 months (for NP01) and at 7.5 or 10 months after injection (for NP03 and NP04;respectively, due to equipment availability). Illumination in all cases was  $\geq 0.4$  Lux except for CH08 and CH09 where illumination was 0.04 Lux.. Significant improvements in the PLR were observed in all subjects except NP04 (in whom detailed testing was not performed) and CH11.

**p  $\leq 0.004$** **p  $\leq 0.09$** 

| Subject | Baseline Amplitude | Post-Rx Amplitude | p-value           | Baseline Velocity | Post-Rx Velocity | p-value            |
|---------|--------------------|-------------------|-------------------|-------------------|------------------|--------------------|
| NP01*   | 0.39 (0.07)        | 0.64 (0.14)       | <b>p=0.003</b>    | -0.76 (0.14)      | -1.21 (0.19)     | <b>p=0.0004</b>    |
| NP02    | -0.01 (0.03)       | 0.46 (0.07)       | <b>p&lt;0.001</b> | -0.02 (0.06)      | -1.5 (0.24)      | <b>p&lt;0.0001</b> |
| NP03**  | 0.48 (0.03)        | 0.80 (0.07)       | <b>p = 0.03</b>   | -1.7 (0.27)       | -2.3 (0.12)      | <b>p = 0.09</b>    |
| NP04*** | 0.51 (0.07)        | 0.35 (0.06)       | p=0.16            | -1.0 (0.12)       | -0.91 (0.17)     | p=0.6              |
| CH06^   | 0.27 (0.42)        | 0.67 (0.01)       | <b>p =0.03</b>    | -0.26 (0.40)      | -2.0 (0.20)      | <b>P=0.001</b>     |
| CH08    | -0.14 (0.11)       | 0.82 (0.13)       | <b>p = 0.0002</b> | -0.26 (0.4)       | -2.0 (0.2)       | <b>p = 0.004</b>   |
| CH09    | 0.16 (0.28)        | 1.20 (0.20)       | <b>P=0.04</b>     | -0.07 (0.28)      | -2.58 (0.22)     | <b>P=0.001</b>     |
| CH10    | 0.65 (0.03)        | 1.83 (0.69)       | <b>p = 0.07</b>   | -2.13 (0.13)      | -3.97 (0.54)     | p=0.002            |
| CH11    | 0.2 (0.17)         | 0.32 (0.07)       | p=0.46            | -0.61 (0.09)      | -0.97 (0.18)     | p=0.39             |
| CH12^   | 0.24 (0.08)        | 0.96 (0.21)       | <b>P=0.001</b>    | -0.001 (0.46)     | -1.84 (0.76)     | <b>p=0.01</b>      |
| CH13^   | 0.009 (0.05)       | 1.04 (0.73)       | <b>P=0.06</b>     | -0.04 (0.05)      | -1.96 (1.29)     | p=0.16             |
| NP15^   | 0.15 (0.84)        | 0.43 (0.16)       | P=0.33            | -0.54 (0.21)      | -1.4 (0.28)      | <b>P=0.03</b>      |

\*Analyses carried out at 5 mos

\*\* Analyses carried out at 10 mos

\*\*\*Analyses carried out at 7.5 mos

^ Analyses carried out at 2 mos

•

**Supplementary Table 6 Mobility Course Data**

The subjects were tested for their ability to avoid objects on a mobility course and the time that it took them to navigate this course was measured. Both eyes were open except for some cases where either the injected eye or the uninjected eye was occluded. The time to navigate the obstacle course was affected by the individual's ability to see the course and the individual's level of self-confidence. Their ability to see the course was affected by the room lighting – at least prior to injection. Post-injection data is presented for day 90. In some cases after injection, the mobility test was given under dim light in order to probe the limits of the improved navigation.

Several individuals improved their ability to navigate the obstacle course (highlighted in yellow). In some of these situations, it took longer to complete the course, but in others, the completion time was considerably reduced. Three of the subjects (CH08, CH09, CH10) could navigate the course - even under dim illumination- using their injected eye, but not their uninjected eye.

Data for the three low dose subjects NP02 was presented in part by Maguire et al<sup>1</sup> and is listed here for comparison.. NA, not available

| Subject | Baseline Time (sec) | Post-Injection Time (sec) | Baseline Obstacles Avoided | Post-Injection Obstacles Avoided | Dimmest Light Tested (lux) | Other                   |
|---------|---------------------|---------------------------|----------------------------|----------------------------------|----------------------------|-------------------------|
| NP01    | 152                 | 155                       | 3/13                       | 3/13                             | 250                        |                         |
| NP02    | 112                 | 177                       | 0/14                       | 12/13                            | 250                        |                         |
| NP03    | 69                  | 71                        | 11/14                      | 12/13                            | 250                        |                         |
| NP04    | 30                  | NA                        | 12/14                      | NA                               | 250                        |                         |
| CH06    | 67                  | 66                        | 3/11                       | 6/13                             | 250                        |                         |
| CH08    | 73                  | 57                        | 2/12                       | 11/12                            | 250                        |                         |
| CH08    | 69                  |                           | 1/12                       |                                  | 50                         |                         |
| CH08    |                     | 94                        |                            | 11/12                            | 10                         | Uninjected eye occluded |
| CH08    |                     | 355                       | 3/13                       |                                  | 50                         | Injected eye occluded   |
| CH09    | 46                  | 20                        | 10/13                      | 12/13                            | 250                        | Uninjected eye occluded |
| CH09    |                     | 27                        |                            | 12/13                            | 10                         | Uninjected eye occluded |
| CH09    |                     | 421                       |                            | 0/12                             | 10                         | Injected eye occluded   |
| CH09    |                     | 19                        |                            | 12/12                            | 1.0                        | Uninjected eye          |

|      |     |     |       |       |       |                               |
|------|-----|-----|-------|-------|-------|-------------------------------|
|      |     |     |       |       |       | occluded                      |
| CH10 | 346 |     | 10/13 |       | 250   | Uninjected<br>eye<br>occluded |
| CH10 |     | 37  |       | 13/13 | 150   | Uninjected<br>eye<br>occluded |
| CH10 |     | 283 |       | 12/13 | 4     | Uninjected<br>eye<br>occluded |
| CH11 | 54  |     | 9/13  |       | 250   | Uninjected<br>eye<br>occluded |
| CH11 |     | 84  |       | 12/13 | 150   | Uninjected<br>eye<br>occluded |
| CH12 | 70  | 122 | 3/11  | 4/12  | 250   |                               |
| CH13 | 60  |     | 3/11  |       | 250   | Uninjected<br>eye<br>occluded |
| CH13 |     | 92  |       | 6/12  | 200   | Uninjected<br>eye<br>occluded |
| NP15 | 99  | 10  | 6/12  | 14/14 | 50-60 | Uninjected<br>eye<br>occluded |

1. Maguire AM, Simonelli S, Pierce EA, et al. Safety and Efficacy of Gene Transfer for Leber Congenital Amaurosis. New England j Medicine 2008;358(21):2240-8.

Supplementary Figure 1

An optical coherence tomography (OCT) image from CH10 at d8 is shown demonstrating normal foveal anatomy in this child with nystagmus.

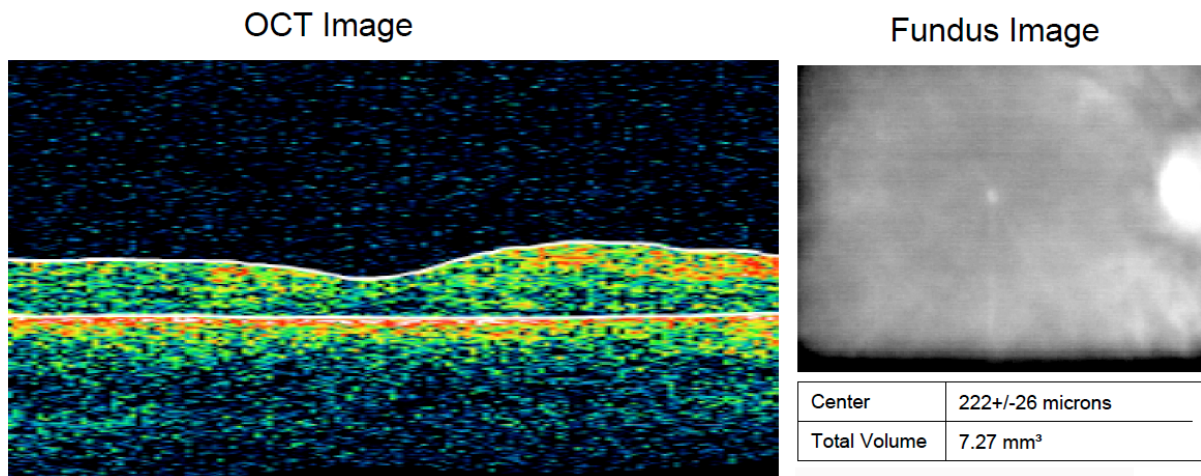

Supplementary Figure 2. Visual Acuity

Testing showed that the postoperative average visual acuity LogMAR and Snellen values in the injected and uninjected eyes. Data for the low dose cohort (NP01 -> NP03) are presented elsewhere (15, 20). Significant improvements in visual acuity were noted in the injected eyes of NP04, CH10, CH11, and NP15. A worsening of visual acuity was noted in CH06.

Improvements in visual acuity in the injected eyes were often accompanied by improvements in the uninjected eye. The LogMAR value for NP04's injected eye improved by 0.56, from a Snellen equivalent of 20/300 to 20/104; \*\*\*\* $p < 0.0001$ , Wilcoxon ranksum test). The uninjected eye improved by a smaller increment (by LogMAR 0.21, from a Snellen equivalent of 20/112 to 20/69;  $p < 0.0001$ ). The postoperative average visual acuity LogMAR value for NP15 improved by LogMAR 0.44 from a Snellen equivalent of 20/200 (LogMAR 0.96) to 20/61.2 (LogMAR 0.525) (\*\* $p = 0.0003$ ; Figure 2). Visual acuity in the contralateral uninjected eye improved by a smaller extent; from a Snellen equivalent of 20/80 (LogMAR 0.744) to 20/63 (LogMAR 0.48; \* $p = 0.0002$ ). Improvements were also noted in CH10 and CH11 (^, ^^:  $p = 0.002, 0.004$ , respectively). A worsening ( $p = 0.04$ ) was noted in CH06.

Age-dependent effects of genotype on LCA

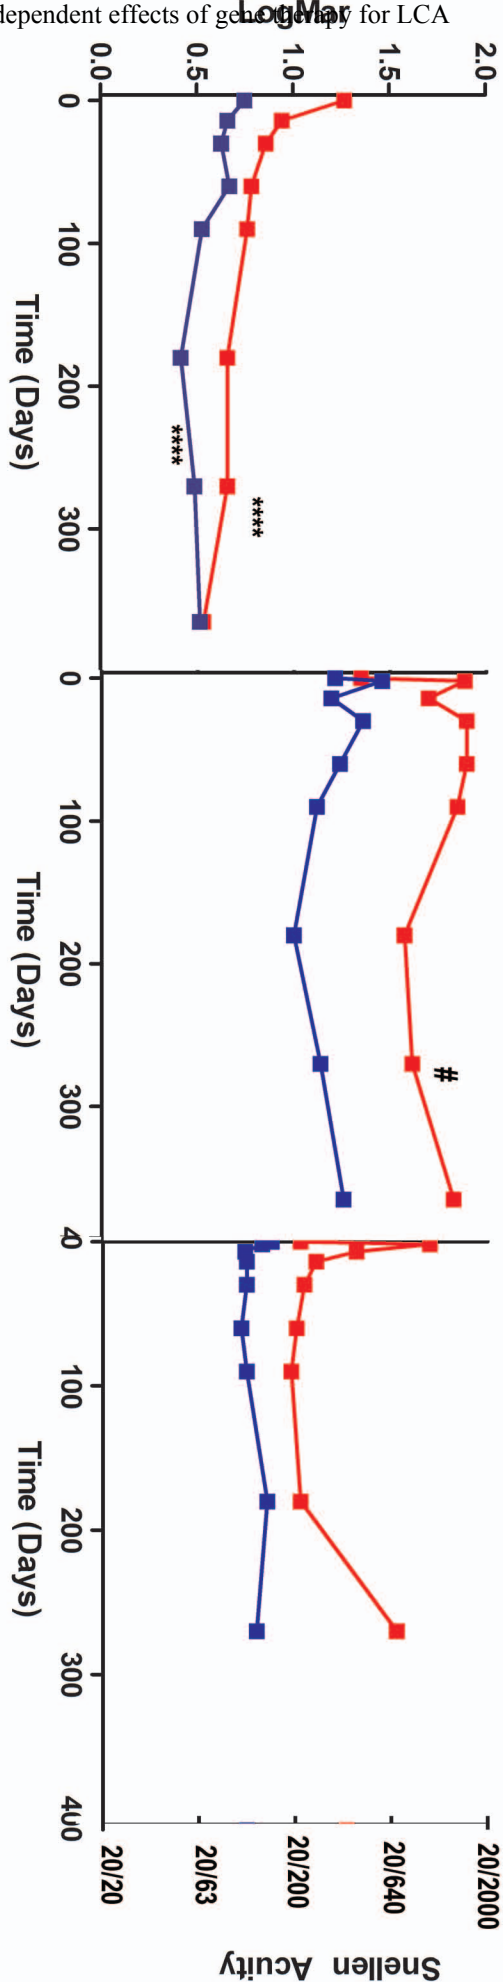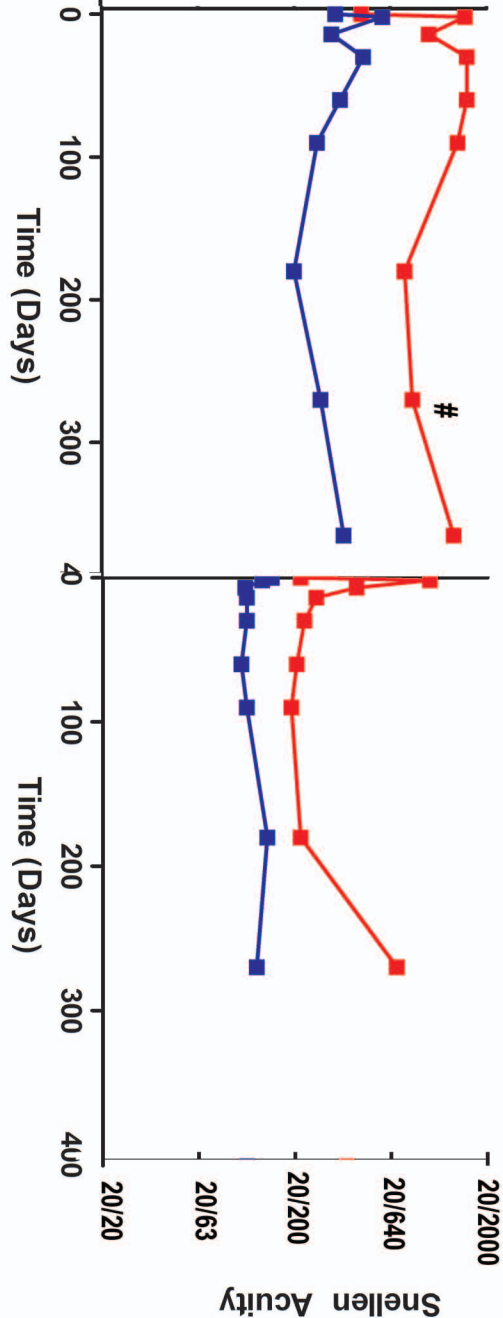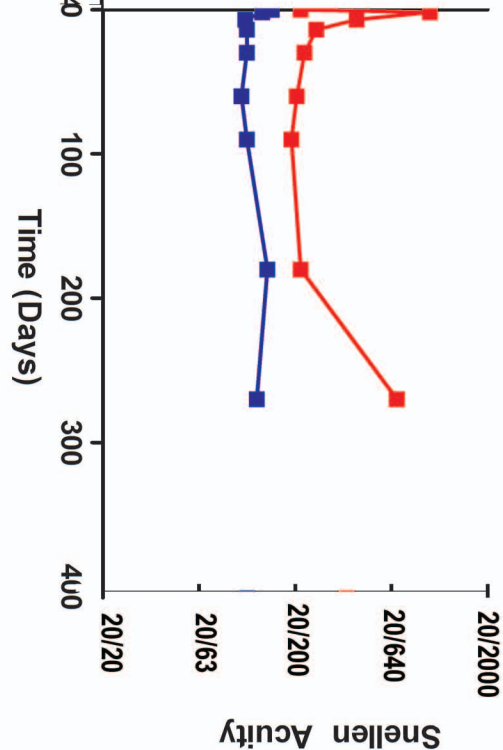

CH09

CH10

CH11

NP15

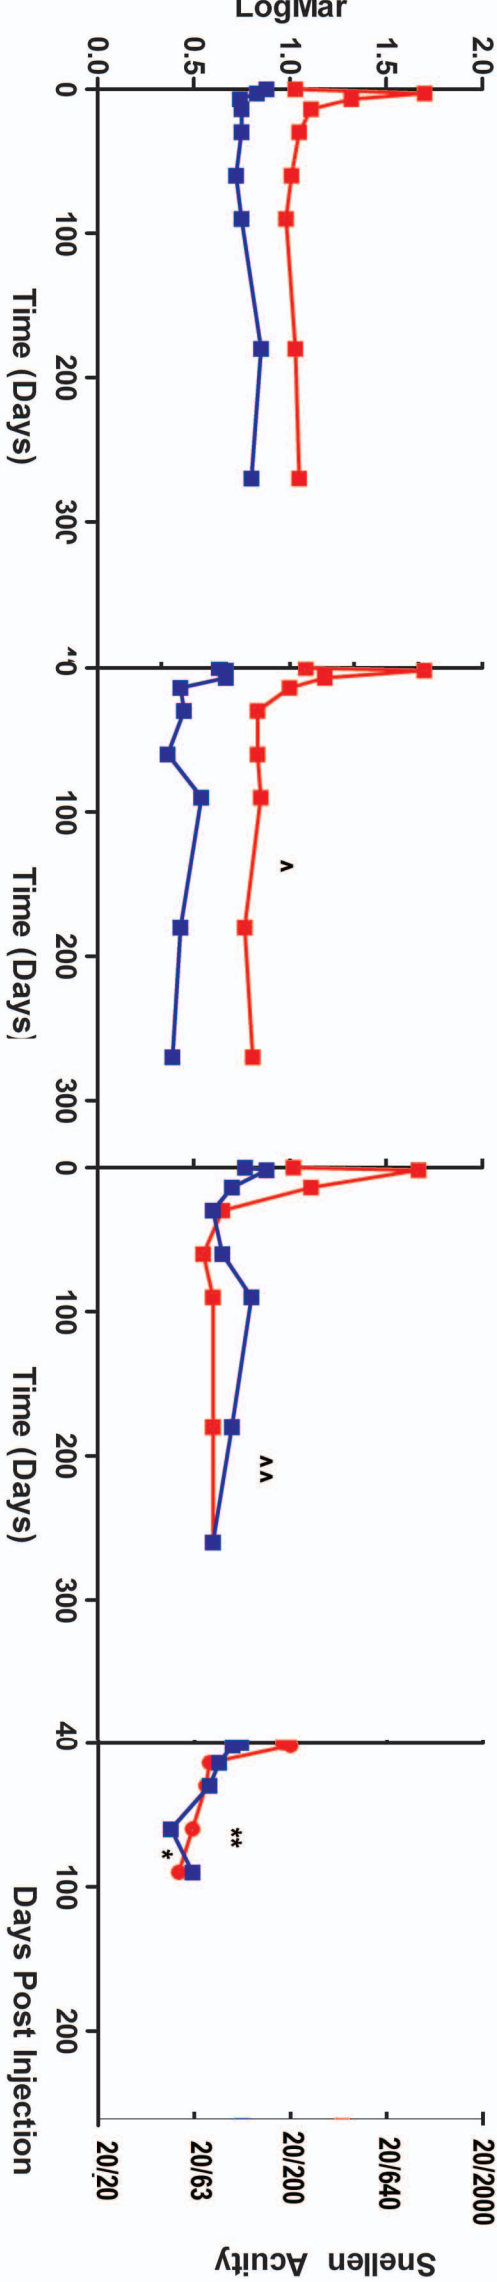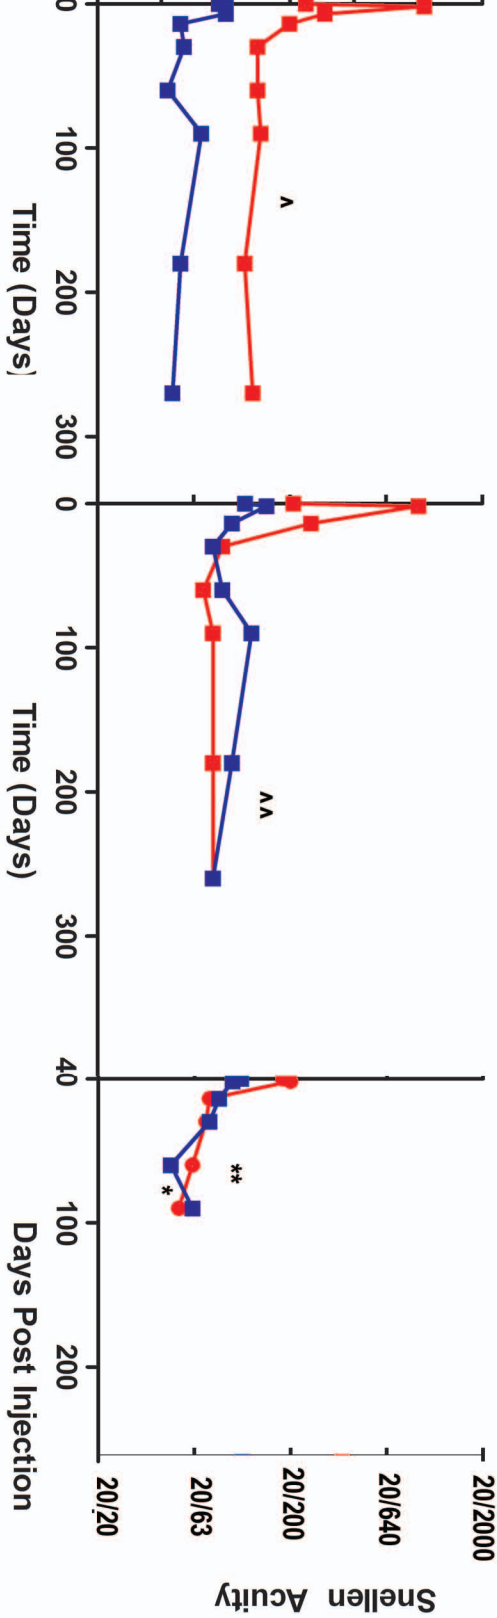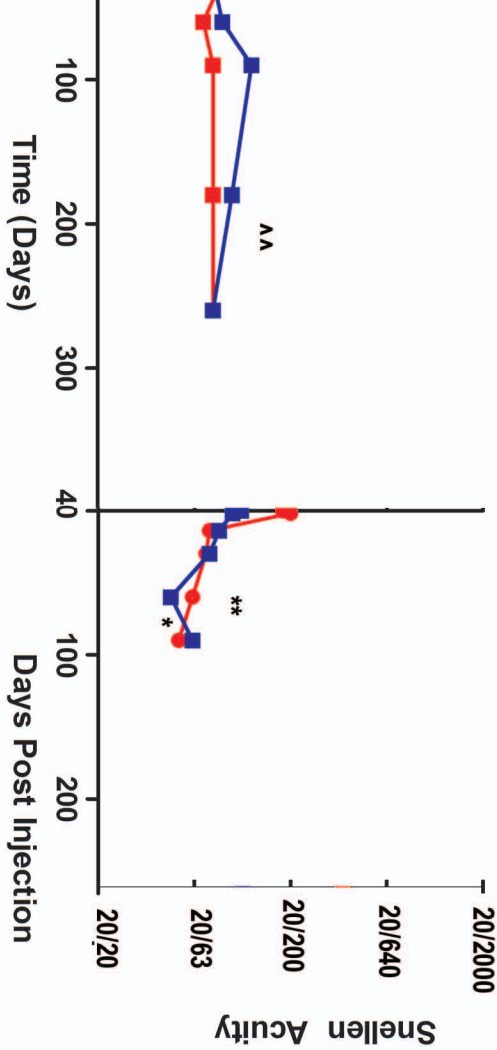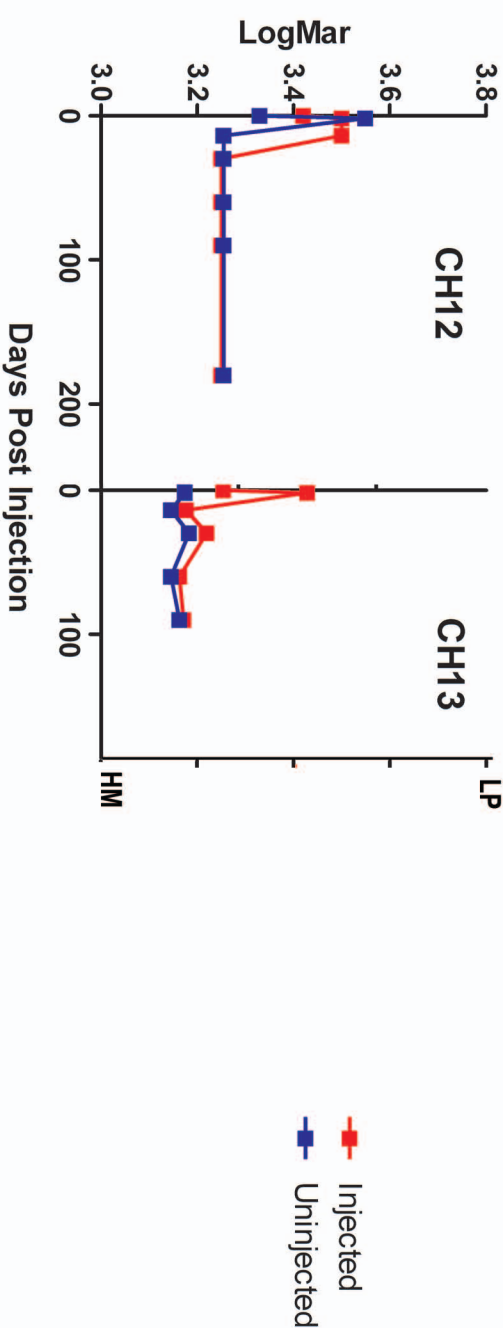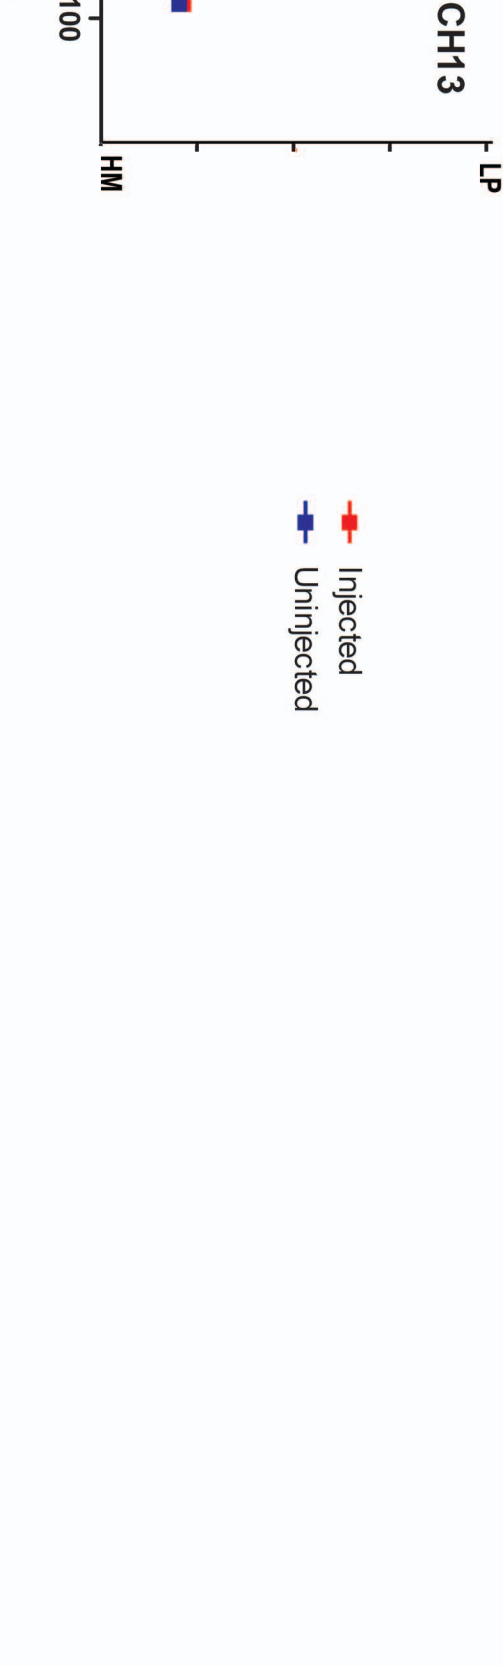

Supplementary Figure 3. Multifocal ERGs (mfERGs)

NP15: Baseline, d30, and d60 recordings suggest development of a mfERG signal in the injected region of the retina (macula) in NP15. 3-dimensional graphs of the macular recordings are shown for each timepoint. Underneath are ERG traces in each field. Individual ERG traces are magnified. NP04: Suggestion of a small mfERG signal post-injection (d90) in the left (injected) retina (macula). The mfERG was performed with use of a Veris Science 6.1 system (EDI, Inc, San Mateo, CA) according to ISCEV (International Society for Clinical Electrophysiology of Vision) standards using DTL electrodes and a stimulus array of 103 hexagons (Hood DC ISCEV Guidelines 2007). The number of potential mfERG identified responses, in the mfERG traces array, range from 1 to 3 of the 103 areas stimulated in these two subjects.

NP15

Right (injected)

Left

Baseline

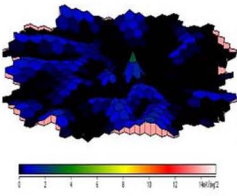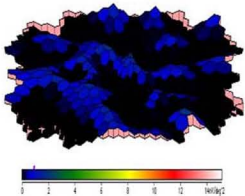

Baseline Right (injected) data description text.

Baseline Left data description text.

d30

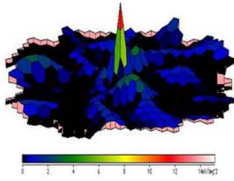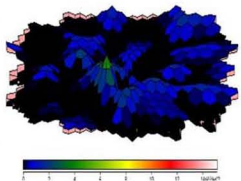

d30 Right (injected) data description text.

d30 Left data description text.

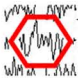

d30 Right (injected) data description text.

d30 Left data description text.

d60

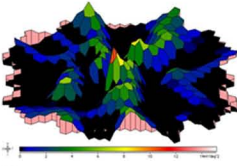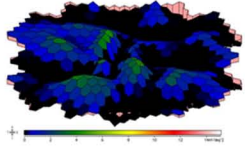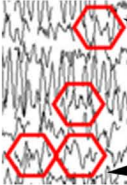

d60 Right (injected) data description text.

d60 Left data description text.

NP04

Right

Left (Injected)

d90

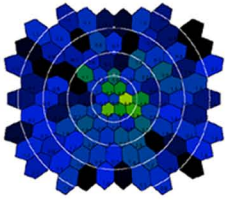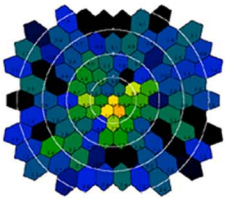

d90 Right data description text.

d90 Left (Injected) data description text.

### Web Videos

Web Videos 1, 2: Results of mobility course testing in subject CH09 (8yo) 3 months after injection of the left eye. Video 1 shows the subject traversing the obstacle course with his left (injected) eye patched. He has difficulty seeing the course and it takes him a long time to complete the test. Video 2, captured within 10 minutes of Video 1, shows the same subject traversing a reconfigured obstacle course with his contralateral (right, uninjected) eye patched. {He is using his injected eye for navigation.} He has no difficulty completing the test accurately. Room light for both tests is 10 lux. {Movies have been color corrected.}

Web Videos 3, 4: Results of mobility course testing in subject CH08 (9yo) at d270 after injection of the right eye. Video 3 shows the subject traversing the obstacle course with his left (injected) eye patched. He has difficulty seeing the course and tells his father that he cannot see anything except white and black (in Flemish Dutch). He says, “The eye that didn’t have surgery I s not good in the dark. You know that. That eye can’t see anything.” It takes him a long time to complete the test. Video 4 shows the same subject traversing a reconfigured obstacle course with his contralateral (right, uninjected) eye patched. {He is using his injected eye for navigation.} He has no difficulty completing the test accurately. Room light for both tests is 4 lux.

Web Videos 5, 6: Results of mobility course testing in subject CH10 (10yo) at d180 after injection of his right eye. Video 5 shows the subject traversing the course with his left (injected) eye patched. He has difficulty seeing the course, complains to his mother that he cannot see anything (in Flemish Dutch) and it takes him a long time to complete the test. Video 6 shows the same subject traversing the mobility course with his contralateral (right, uninjected) eye patched. {He is using his injected eye for navigation.} He looks carefully at the landmarks but completes the test with good accuracy. Room light for both tests is 4 lux.
